# Supplementary material
Source: PubMed Central journal article supplement (PMC10420388)
Supplement: NIHMS1921051-supplement-Supplementary_Material.pdf [file NIHMS1921051-supplement-Supplementary_Material.pdf]

# THE LANCET

## Supplementary appendix

This appendix formed part of the original submission and has been peer reviewed. We post it as supplied by the authors.

Supplement to: Gregg EW, Buckley J, Ali MK, et al. Improving health outcomes of people with diabetes: target setting for the WHO Global Diabetes Compact. *Lancet* 2023; published online March 14. [https://doi.org/10.1016/S0140-6736\(23\)00001-6](https://doi.org/10.1016/S0140-6736(23)00001-6).

## SUPPLEMENTARY MATERIAL

### Contents:

| PAGE | MATERIAL                                                                                                                                                                                         |
|------|--------------------------------------------------------------------------------------------------------------------------------------------------------------------------------------------------|
| 1    | Summary of methods to recommend <i>Global Diabetes Compact</i> metrics and targets.                                                                                                              |
| 2    | Figure: methods and steps to recommend <i>Global Diabetes Compact</i> metrics and targets.<br>Table S1. Criterion and rating scale for potential metrics of the <i>Global Diabetes Compact</i> . |
| 3    | Methods of data assembly and literature Review:                                                                                                                                                  |
| 4    | Figure S2: Proportions of adults with diabetes who are diagnosed from low- and middle-income countries.                                                                                          |
| 5    | Figure S3: Proportions of adults with diabetes who are diagnosed from high-Income countries.                                                                                                     |
| 6    | Figure S4: Proportion of adults with diagnosed diabetes with HbA <sub>1c</sub> < 8.0%.                                                                                                           |
| 7    | Figure S5: Proportion of adults with diagnosed diabetes with blood pressure < 140/90 mmHg.                                                                                                       |
| 8    | Figure S6: Proportion of adults with diagnosed diabetes taking a statin                                                                                                                          |
| 9    | References for Supplemental Material                                                                                                                                                             |

### **Summary of Methods and Steps to Recommend *Global Diabetes Compact* Metrics and Targets:**

To prioritize metrics and target levels, we followed a systematic process (Figure S1). First, we organized potential metrics across 4 domains (policy and system-level factors, processes of care, biomarkers and behaviours, and health events and outcomes) and risk tiers (diagnosed diabetes, high risk for diabetes, whole population).<sup>1</sup> Second, the authors reviewed, scored, and filtered, and then prioritized metrics through a consensus-based process according to their health importance, modifiability, data availability, and the degree to which they represent areas of global inequality. This led to a set of “core” and “complementary” metrics. The core metrics are intended for priority implementation by UN member states and monitoring by the *Global Diabetes Compact*. The complementary metrics currently lack adequate global data availability or consensus-based definitions, and thus are currently unsuitable for recommendation as core *Compact* metrics but should be considered for scale-up in population health data and surveillance systems. Third, we reviewed published and unpublished data on the current levels of attainment of the chosen metrics, by global region and country and evidence from modelling-based studies to estimate the expected health impact of meeting different target levels. Fourth, we used the information and evidence from these steps to propose a set of *target levels* for core metrics. Finally, the proposed metrics and target levels were presented to a WHO-convened, international review panel and reviewed by member states’ ministries of health and WHO regional offices. Our recommendations incorporate input from all steps in this process.

**Figure 1. Methods and steps to recommend *Global Diabetes Compact* metrics and targets.**

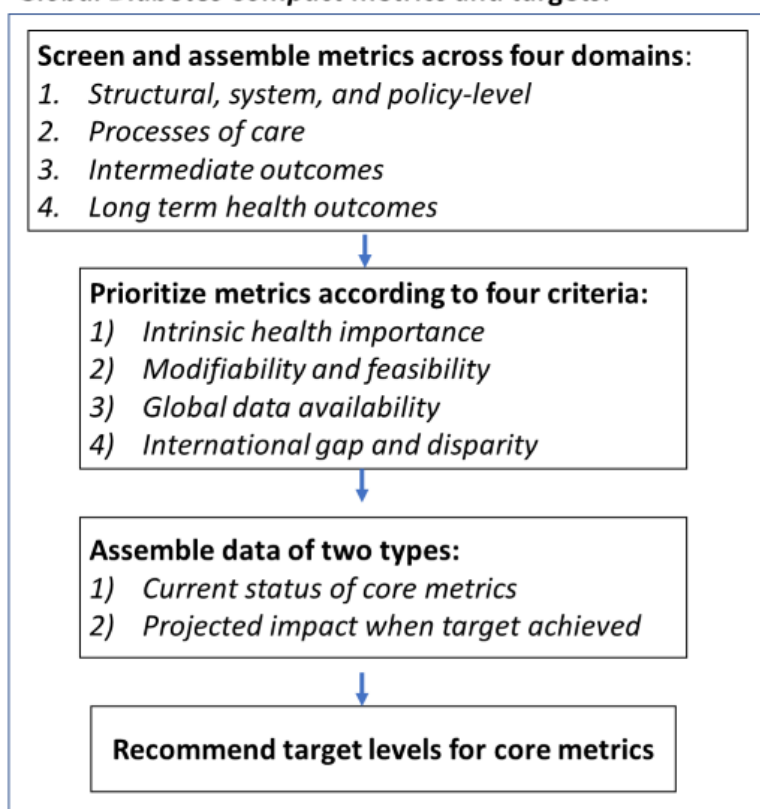

**Table S1. Criterion and rating scale for potential metrics of the *Global Diabetes Compact*.**

| Criterion                                                                                                 | Excellent                                                                 | Good                                                                         | Fair                                                              |
|-----------------------------------------------------------------------------------------------------------|---------------------------------------------------------------------------|------------------------------------------------------------------------------|-------------------------------------------------------------------|
| Intrinsic <b>health importance</b> or strong evidence for prediction or benefit on major health outcomes. | Major health outcome affecting QOL (e.g., MI, LEA).                       | Biomarker or intervention with clear causal linkage to health outcome.       | Process, intervention, or factor with potential linkage.          |
| <b>Modifiable</b> with scalable interventions targeting the metric.                                       | Clearly efficacious and scalable via evidence-based means.                | Moderately efficacious and scalable.                                         | Lacking clear scalability – or – clear health effect if scalable. |
| Strong global <b>data availability</b> with acceptable measurement properties.                            | Currently available for 75% of countries.                                 | Currently available for 25 - 75% of countries.                               | Available for fewer than 25% of countries.                        |
| <b>International gap and disparity</b>                                                                    | Large proportion of population affected and large international variation | Large proportion of population affected – OR - large international variation | Modest international gap or limited variation                     |

LEA, lower-extremity amputation; MI, myocardial infarction; QOL, quality of life.

## **Methods of Data Assembly and Literature Review:**

To inform the selection of target levels for core metrics, we assembled data from the Global Health and Population Project on Access to Care for Cardiometabolic diseases (HPACC), recent systematic reviews,<sup>2,3</sup> and additional literature searches. The data assembly and study inclusion methods of the HPACC have been described.<sup>2,4,5</sup> In brief, the HPAAC consists of all available STEPs and nationally representative studies in LMICs from 2008 – April 2020. These STEPS surveys included: 2016 Algeria, 2017 Azerbaijan, 2016 Belarus, 2015 Benin, 2014 Bhutan, 2014 Botswana, 2013 Burkina Faso, 2010 Cambodia, 2011 Comoros, 2010 Costa Rica, 2010 Eritrea, 2014 Eswatini, 2016 Georgia, 2016 Guyana, 2016 Iran, 2015 Iraq, 2015 Kenya, 2015 Kiribati, 2013 Kyrgyzstan, 2013 Laos, 2017 Lebanon, 2012 Lesotho, 2011 Liberia, 2013 Moldova, 2013 Mongolia, 2017 Morocco, 2014 Myanmar, 2013 Nepal, 2012 Rwanda, 2013 Samoa, 2009 Sao Tome and Principe, 2015 Solomon Islands, 2013 St. Vincent & the Grenadines, 2015 Sudan, 2016 Tajikistan, 2012 Tanzania, 2014 Timor Leste, 2010 Togo, 2015 Tuvalu, 2014 Uganda, 2011 Vanuatu, 2015 Vietnam, 2017 Zambia, and 2011 Zanzibar.

To assemble estimates for high-income countries, we searched Google Scholar. For estimates of diagnosed diabetes, we searched using the following terms: "[county name]" AND survey AND diabetes AND ("population-based" OR "nationally representative") AND ("diagnosed" OR "undiagnosed"). For glycaemic control, we searched: "[county name]" AND survey AND ("population-based" OR "nationally representative") AND (diabetes) AND (("HbA<sub>1c</sub>" OR "A1C" OR "glycemic" OR "glycaemic") AND control). For blood pressure control, we searched: "[county name]" AND survey AND (diabetes) AND ("population-based" OR "nationally representative") AND (("blood pressure" OR hypertension) AND "control"). For statin use, we searched: "[county name]" AND survey AND ("population-based" OR "nationally representative") AND (diabetes) AND ("statin" OR "lipid-lowering drug"). We then applied the following inclusion criteria:

- Published on or after January 2010; when two surveys were available the most recent was used
- Data collected at the individual-level or used electronic health records
- The survey was conducted in one of the WHO member states
- The survey or study was nationally representative
- The survey had a response rate of >80%
- Survey measured a biomarker for diabetes: glycated haemoglobin (HbA<sub>1c</sub>)
- Contained data on at least one core metric, defined in this paper ensuring identical denominators.

Because the number of sub-samples with diagnosed diabetes were low for some surveys, we have only reported estimates wherein the total number of cases of diabetes is at least 150, and for estimates of HbA<sub>1c</sub>, blood pressure, and statin use, where the number of diagnosed cases is at least 150. For the complementary metrics, we also assembled data from previously published reviews of diabetes incidence, all-cause and cardiovascular mortality, and incidence of diabetes-related complications.<sup>6-8</sup> For high-income countries, we relied on a search of published sources containing levels for the metrics specified as selected for *the Compact*. Thus, estimates are derived from a combination of STEPs and other nationally representative surveys conducted between 2009-2019 with strong response rates (74-96%) and sample sizes of ~2000-5000 in most surveys.<sup>2,3</sup>

We defined diabetes as use of a glucose-lowering drug (oral drugs or insulin) or an elevated biomarker meeting the WHO's criteria for diabetes: fasting plasma glucose (FPG)  $\geq 7.0$  mmol/L (126 mg/dL), random plasma glucose  $\geq 11.1$  mmol/L (200 mg/dL), or HbA<sub>1c</sub>  $\geq 6.5\%$ . In surveys reporting uncalibrated capillary glucose measurements, we converted values to plasma glucose by multiplying by a factor of 1.11 based on evidence that capillary values underestimate plasma values.<sup>9</sup> This conversion is standard in large-scale population-based diabetes studies. Please also see our prior work in which we have extensively documented details of the biological measurements in each survey.<sup>2-4,10</sup>

Limitations of our search: We only used the first 50 English language results from Google Scholar. Grey literature was not directly searched and only included if readily available or linked in a similar journal article. Due to the precise nature of the indicators required, articles were excluded due to their non-random sampling methods, non-representative populations, or variations in the denominators. Often the search strategy produced papers whereby the denominator was hypertensive patients, and the numerator was individuals with diabetes rather than the converse.

**Figure S2: Proportions of adults with diabetes who are diagnosed from low- and middle-income countries.**

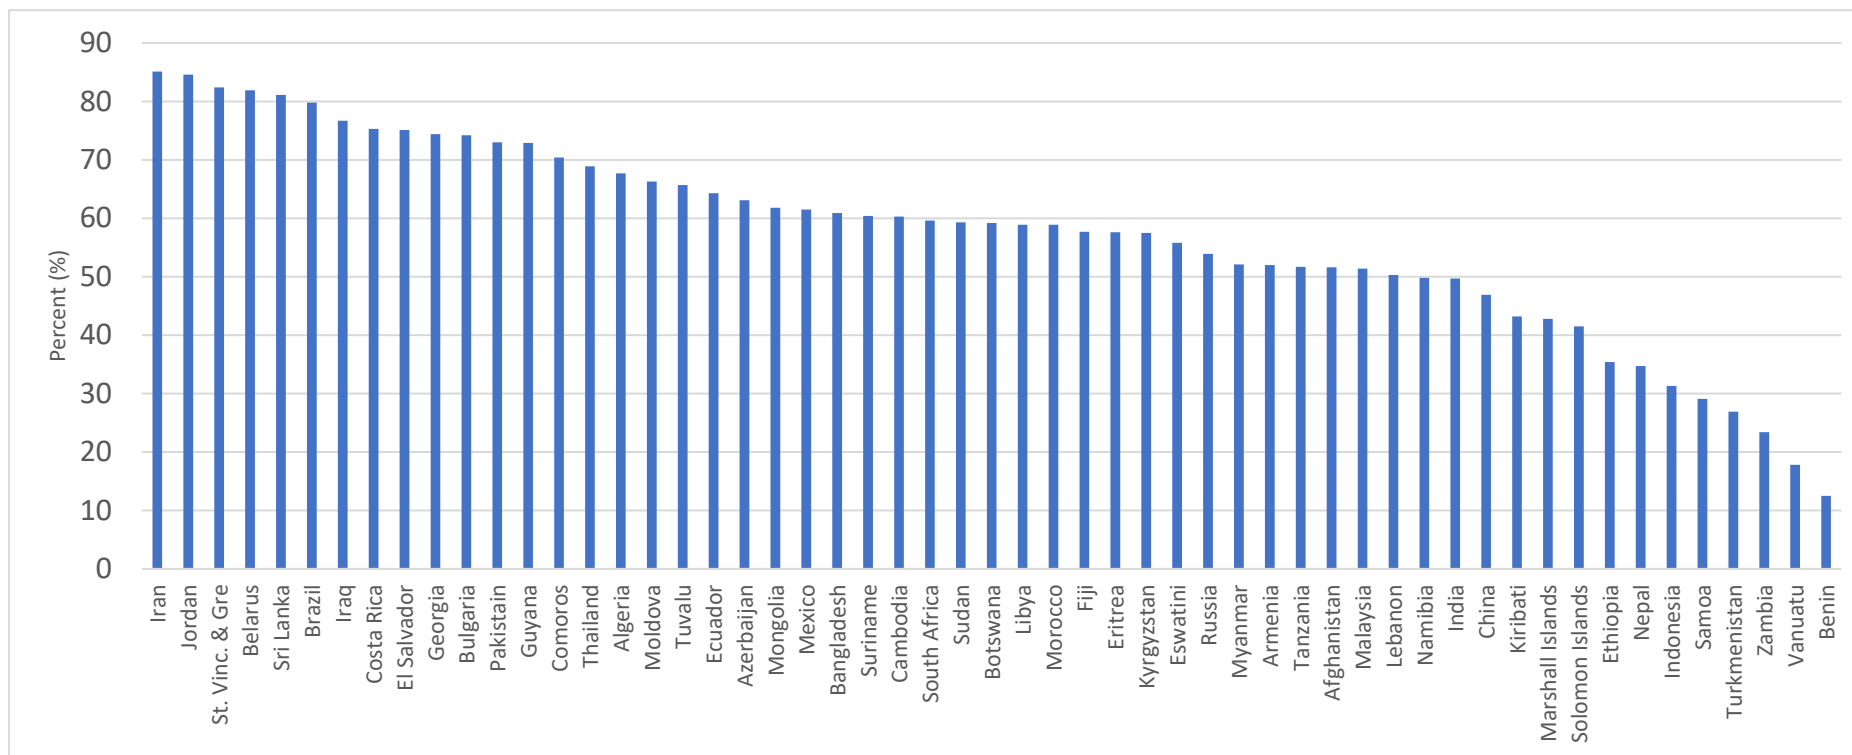

Data only shown for surveys with sample size of persons with diabetes  $\geq 150$ . Diabetes defined as use of a glucose-lowering drug (oral glucose-lowering drugs or insulin) or an elevated biomarker meeting the WHO's criteria for diabetes: fasting plasma glucose (FPG)  $\geq 7.0$  mmol/L (126 mg/dL), random plasma glucose  $\geq 11.1$  mmol/L (200 mg/dL), or glycated haemoglobin (HbA<sub>1c</sub>)  $\geq 6.5\%$ .  
References for Figure S2: <sup>11-17</sup>

**Figure S3: Proportions of adults with diabetes who are diagnosed from high-Income countries.**

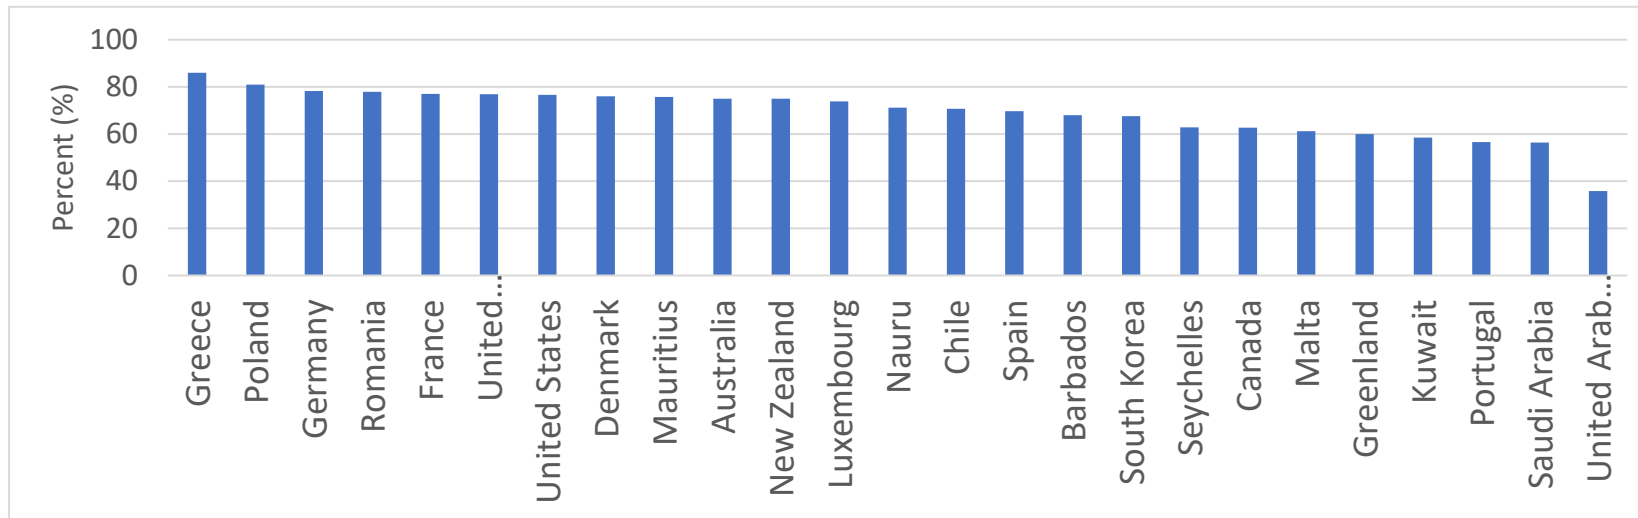

Data only shown for surveys with sample size of persons with diabetes  $\geq 150$ . Diabetes defined as use of a glucose-lowering drug (oral glucose-lowering drugs or insulin) or an elevated biomarker meeting the WHO's criteria for diabetes: fasting plasma glucose (FPG)  $\geq 7.0$  mmol/L (126 mg/dL), random plasma glucose  $\geq 11.1$  mmol/L (200 mg/dL), or glycated haemoglobin (HbA<sub>1c</sub>)  $\geq 6.5\%$ .  
 References for Figure S3: <sup>18-35</sup>

**Figure S4: Proportion of adults with diagnosed diabetes with HbA<sub>1c</sub> < 8.0%.**

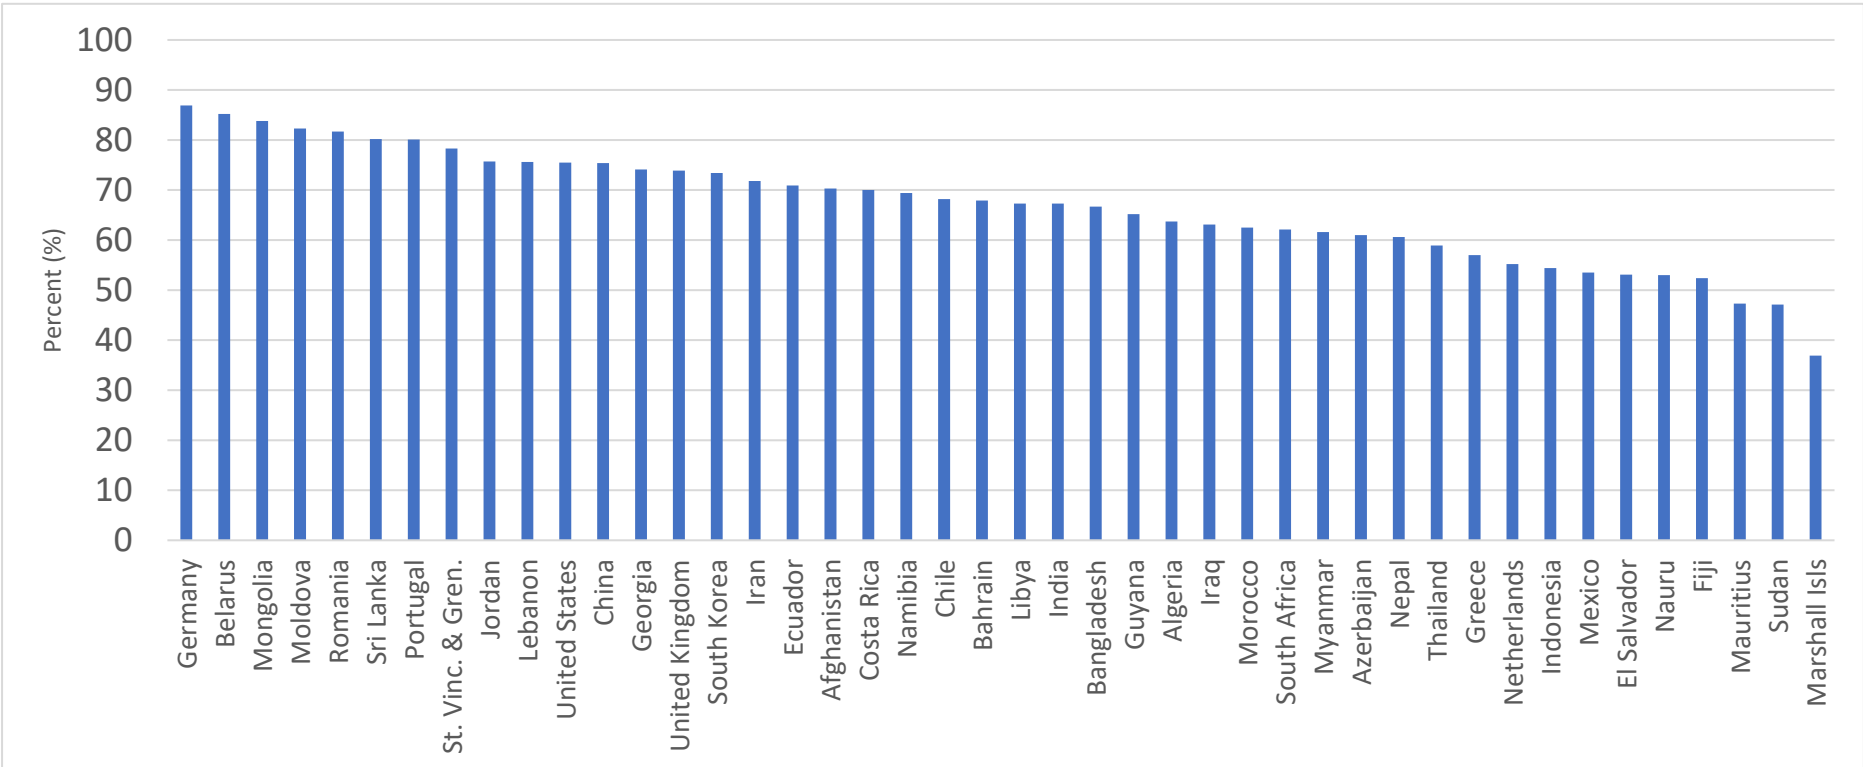

Data only shown for surveys with sample size of persons with diabetes  $\geq 150$ . Diabetes defined as use of a glucose-lowering drug (oral glucose-lowering drugs or insulin) or an elevated biomarker meeting the WHO's criteria for diabetes: fasting plasma glucose (FPG)  $\geq 7.0$  mmol/L (126 mg/dL), random plasma glucose  $\geq 11.1$  mmol/L (200 mg/dL), or glycated haemoglobin (HbA<sub>1c</sub>)  $\geq 6.5\%$ .  
 References for Figure S4: <sup>20,36-42</sup>

Figure S5: Proportion of adults with diagnosed diabetes with blood pressure < 140/90 mmHg.

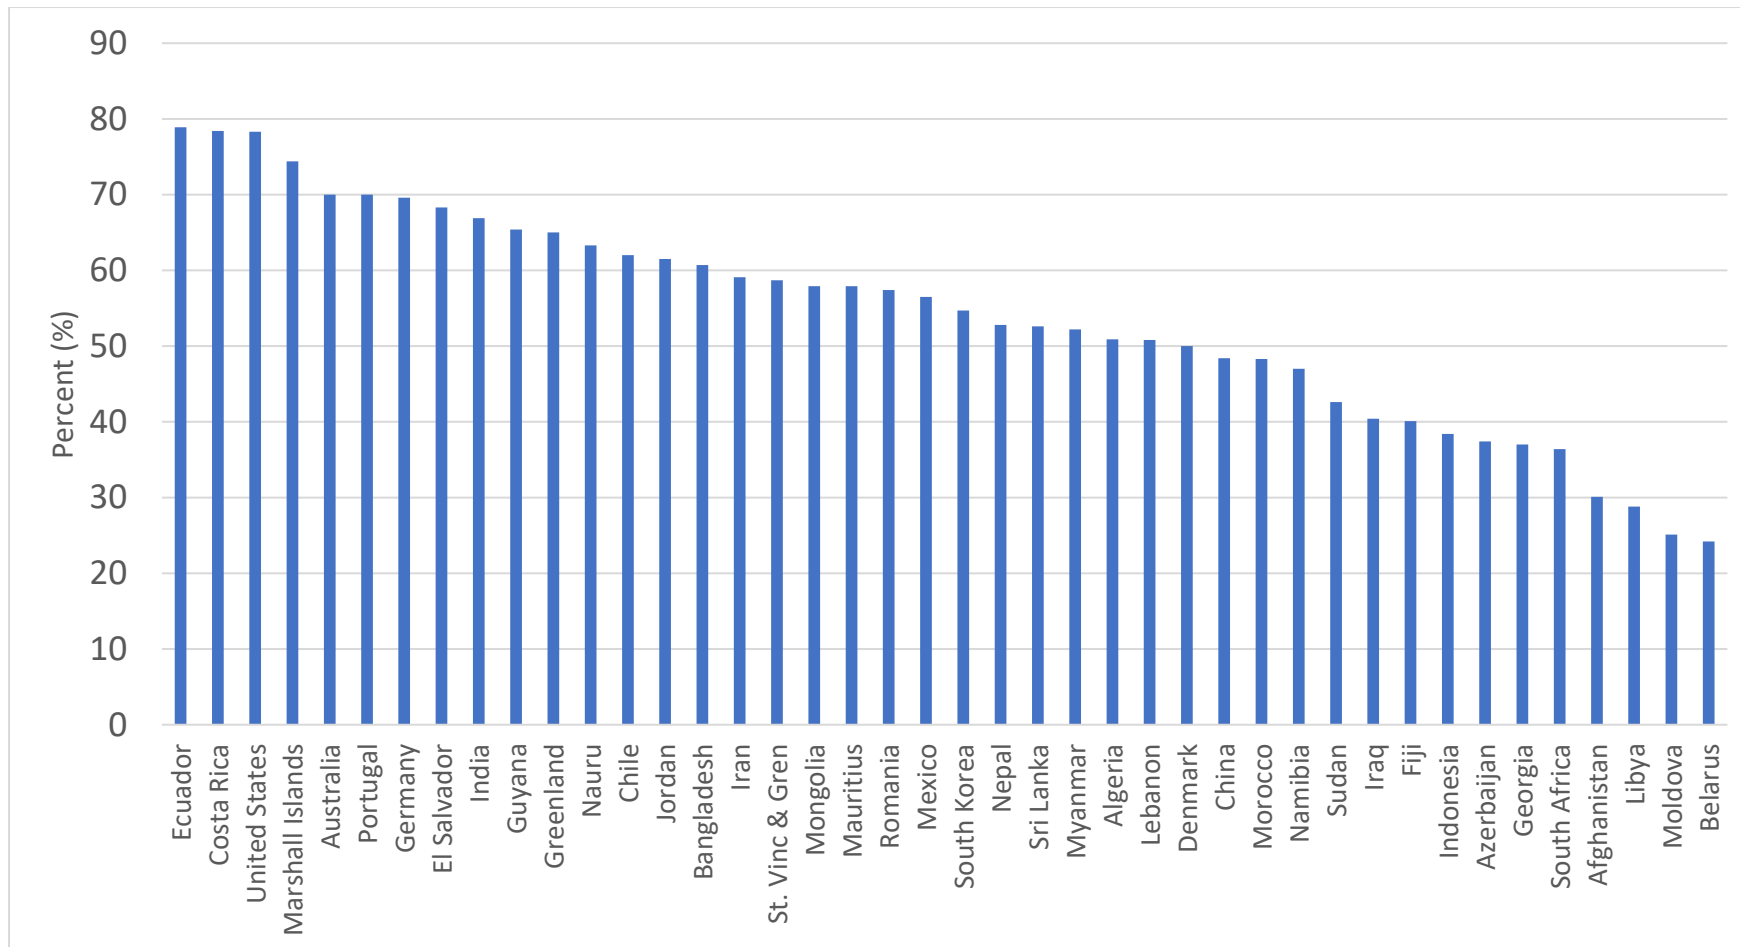

Data only shown for surveys with sample size of persons with diabetes  $\geq 150$ . Diabetes defined as use of a glucose-lowering drug (oral glucose-lowering drugs or insulin) or an elevated biomarker meeting the WHO's criteria for diabetes: fasting plasma glucose (FPG)  $\geq 7.0$  mmol/L (126 mg/dL), random plasma glucose  $\geq 11.1$  mmol/L (200 mg/dL), or glycated haemoglobin (HbA<sub>1c</sub>)  $\geq 6.5\%$ .

References for Figure S5: 20431,36,42-45F



**Figure S6: Proportion of adults with diagnosed diabetes taking a statin.**

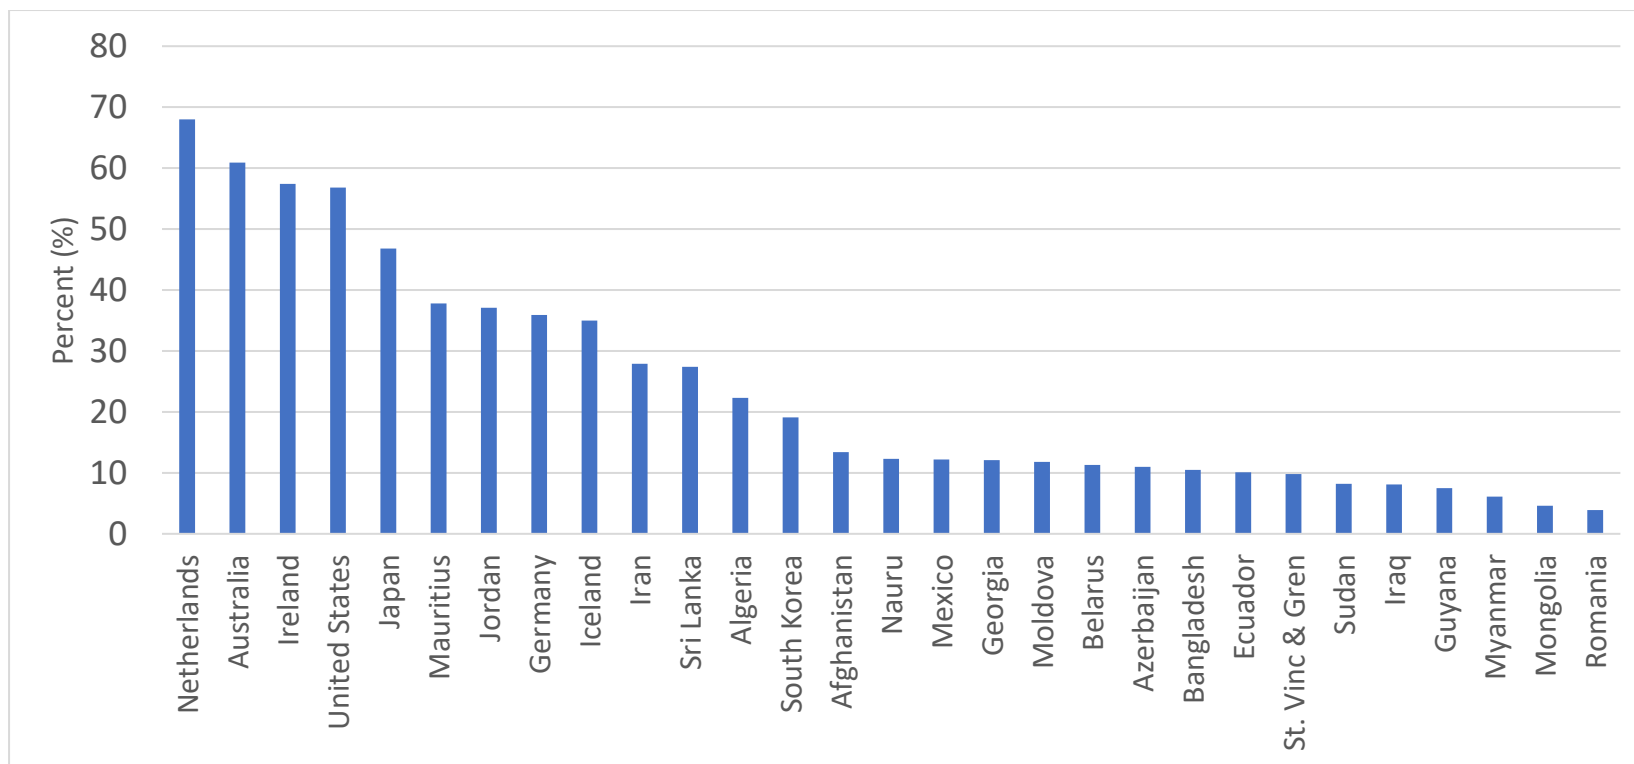

Data only shown for surveys with sample size of persons with diabetes  $\geq 150$ . Diabetes defined as use of a glucose-lowering drug (oral glucose-lowering medication or insulin) or an elevated biomarker meeting the WHO's criteria for diabetes: fasting plasma glucose (FPG)  $\geq 7.0$  mmol/L (126 mg/dL), random plasma glucose  $\geq 11.1$  mmol/L (200 mg/dL), or glycated haemoglobin (HbA<sub>1c</sub>)  $\geq 6.5\%$ . References for Figure S6: <sup>42,46-48 36 49 50 49-51</sup>

## **The Global Health and Population Project on Access to Care for Cardiometabolic diseases (HPACC)**

**collaborators** contributed important data from population surveys that contributed to the recommendation of target levels and review by the Diabetes Targets Expert Consultation Group. Contributors and affiliations of the HPACC are as follows: Kokou Agoudavi<sup>22</sup>; Krishna Aryal<sup>23</sup>; Rifat Atun<sup>24</sup>; Silver Bahendeka<sup>25</sup>; Brice Bicaba<sup>26</sup>; Pascal Bovet<sup>27</sup>; Garry Brian<sup>28</sup>; Albertino Damasceno<sup>29</sup>; Justine Davies<sup>30</sup>; Maria Dorobantu<sup>31</sup>; Farshad Farzadfar<sup>32</sup>; David Flood<sup>33</sup>; Gladwell Gathecha<sup>34</sup>; Pascal Geldsetzer<sup>35</sup>; Mongal Gurung<sup>36</sup>; David Guwatudde<sup>37</sup>; Corine Houehanou<sup>38</sup>; Dismand Houinato<sup>39</sup>; Nahla Hwalla<sup>40</sup>; Lindsay Jaacks<sup>41</sup>; Khem Karki<sup>42</sup>; Demetre Labadarios<sup>43</sup>; Nuno Lunet<sup>44</sup>; Jennifer Manne-Goehler<sup>45</sup>; Maja Marcus<sup>46</sup>; Joao Martins<sup>47</sup>; Mary Mayige<sup>48</sup>; BolormaaNorov<sup>49</sup>; Moghaddam Sahar Saeedi<sup>50</sup>; Quesnel-Crooks Sarah<sup>51</sup>; Abla Sibai<sup>52</sup>; Lela Sturua<sup>53</sup>; Michaela Theilmann<sup>54</sup>; Lindiwe Tsabedze<sup>55</sup>; Sebastian Vollmer<sup>56</sup>; Zhaxybay Zhumadilov<sup>57</sup>.

<sup>22</sup>Togo Ministry of Health, Lome, Togo

<sup>23</sup>Public Health Promotion and Development Organization, Kathmandu, Nepal

<sup>24</sup>Department of Global Health and Population, Harvard T.H. Chan School of Public Health, Harvard University, Boston, MA, USA

<sup>25</sup>Department of Internal Medicine, MKPGMS Uganda Martyrs University, Kampala

<sup>26</sup>Institut National de Santé Publique, Burkina Faso

<sup>27</sup> University Centre for Primary Care and Public Health (Unisanté), Lausanne, Switzerland & Ministry of Health, Seychelles

<sup>28</sup>The Fred Hollows Foundation New Zealand

<sup>29</sup>Faculty of Medicine, Eduardo Mondlane University, Maputo, Mozambique

<sup>30</sup>Institute for Applied Health Research, University of Birmingham, UK

<sup>31</sup>University of Medicine and Pharmacy Carol Davila, Bucharest, Romania

<sup>32</sup>Non-Communicable Diseases Research Center, Endocrinology and Metabolism Population Sciences Institute, Tehran University of Medical Sciences, Tehran, Iran

<sup>33</sup>Division of Hospital Medicine, Department of Medicine, University of Michigan, Ann Arbor, Michigan, USA

<sup>34</sup>Department of Non-Communicable Diseases, Ministry of Health, Nairobi, Kenya

<sup>35</sup>Division of Primary Care and Population Health, Stanford University

<sup>36</sup>Health Research and Epidemiology Unit, Ministry of Health, Thimphu, Bhutan

<sup>37</sup>Department of Epidemiology and Biostatistics, School of Public Health, Makerere University, Kampala, Uganda

<sup>38</sup>Laboratory of Epidemiology of Chronic and Neurological Diseases, Faculty of Health Sciences, University of Abomey-Calavi, Cotonou, Benin

<sup>39</sup>Laboratory of Epidemiology of Chronic and Neurological Diseases, Faculty of Health Sciences, University of Abomey-Calavi, Cotonou, Benin

<sup>40</sup>Faculty of Agricultural and Food Sciences, American University of Beirut, Beirut, Lebanon

<sup>41</sup>Global Academy of Agriculture and Food Security, The University of Edinburgh, Midlothian, United Kingdom

<sup>42</sup>Department of Community Medicine and Public Health, Institute of Medicine, Tribhuvan University, Kathmandu, Nepal

<sup>43</sup>Faculty of Medicine and Health Sciences, Stellenbosch University, Stellenbosch, South Africa

<sup>44</sup>Department of Public Health and Forensic Health Sciences and Medical Education, Faculty of Medicine, University of Porto, Porto, Portugal

<sup>45</sup>Division of Infectious Diseases, Brigham and Women's Hospital, Harvard Medical School, Boston, MA, USA

<sup>46</sup>Department of Economics and Centre for Modern Indian Studies, University of Goettingen, Göttingen, Germany

<sup>47</sup>Faculty of Medicine and Health Sciences, National University of East Timor, Dili, Timor-Leste

<sup>48</sup>National Institute for Medical Research, Dar es Salaam, Tanzania

<sup>49</sup>National Center for Public Health, Ulaanbaatar, Mongolia

<sup>50</sup>Endocrinology and Metabolism Research Center, Endocrinology and Metabolism Clinical Sciences Institute, Tehran University of Medical Sciences, Tehran, Iran

<sup>51</sup>Non-Communicable Diseases, Caribbean Public Health Agency, Port of Spain, Trinidad and Tobago

<sup>52</sup>Epidemiology and Population Health Department, Faculty of Health Sciences American University of Beirut, Beirut, Lebanon

<sup>53</sup>Non-Communicable Disease Department, National Center for Disease Control and Public Health, Tbilisi, Georgia

<sup>54</sup>Heidelberg Institute of Global Health, Faculty of Medicine and University Hospital, Heidelberg University, Heidelberg, Germany

<sup>55</sup>Ministry of Health, Mbabane, Eswatini

<sup>56</sup>Department of Economics and Centre for Modern Indian Studies, University of Goettingen, Göttingen, Germany

<sup>57</sup>Nazarbayev University School of Medicine, Nur-Sultan, Kazakhstan

## References for Supplemental Material

1. Ayanian JZ, Markel H. Donabedian's Lasting Framework for Health Care Quality. *N Engl J Med* 2016; **375**: 205-7.
2. Manne-Goehler J, Geldsetzer P, Agoudavi K, et al. Health system performance for people with diabetes in 28 low- and middle-income countries: A cross-sectional study of nationally representative surveys. *PLoS Med* 2019; **16**: e1002751.
3. Basu S, Flood D, Geldsetzer P, et al. Estimated effect of increased diagnosis, treatment, and control of diabetes and its associated cardiovascular risk factors among low-income and middle-income countries: a microsimulation model. *Lancet Glob Health* 2021; **9**: e1539-e52.
4. Teufel F, Seiglie JA, Geldsetzer P, et al. Body-mass index and diabetes risk in 57 low-income and middle-income countries: a cross-sectional study of nationally representative, individual-level data in 685 616 adults. *Lancet* 2021; **398**: 238-48.
5. Manne-Goehler J, Theilmann M, Flood D, et al. Data Resource Profile: The Global Health and Population Project on Access to Care for Cardiometabolic Diseases (HPACC). *Int J Epidemiol* 2022; **51**(6): e337-e49.
6. Harding JL, Pavkov ME, Magliano DJ, Shaw JE, Gregg EW. Global trends in diabetes complications: a review of current evidence. *Diabetologia* 2019; **62**: 3-16.
7. Magliano DJ, Chen L, Islam RM, et al. Trends in the incidence of diagnosed diabetes: a multicountry analysis of aggregate data from 22 million diagnoses in high-income and middle-income settings. *Lancet Diabetes Endocrinol* 2021; **9**: 203-11.
8. Chen L, Islam RM, Wang J, et al. A systematic review of trends in all-cause mortality among people with diabetes. *Diabetologia* 2020; **63**: 1718-35.
9. Sacks DB. A1C Versus Glucose Testing: A Comparison. *diabetes care* 2011; **34**: 518-23.
10. Davies JI, Reddiar SK, Hirschhorn LR, et al. Association between country preparedness indicators and quality clinical care for cardiovascular disease risk factors in 44 lower- and middle-income countries: A multicountry analysis of survey data. *PLoS Med* 2020; **17**: e1003268.
11. Ajlouni K, Batiha A, Jaddou H, et al. Time trends in diabetes mellitus in Jordan between 1994 and 2017. *Diabet Med* 2019; **36**: 1176-82.
12. Malta DC, Duncan BB, Schmidt MI, et al. Prevalence of diabetes mellitus as determined by glycated hemoglobin in the Brazilian adult population, National Health Survey. *Revista brasileira de epidemiologia = Brazilian journal of epidemiology* 2019; **22Suppl 02**: E190006.Supl.2.
13. Borissova AM, Shinkov A, Kovatcheva R, Vlahov J, Dakovska L, Todorov T. Changes in the prevalence of diabetes mellitus in bulgaria (2006-2012). *Clinical medicine insights Endocrinology and diabetes* 2015; **8**: 41-5.
14. Basit A, Fawwad A, Abdul Basit K, Waris N, Tahir B, Siddiqui IA. Glycated hemoglobin (HbA1c) as diagnostic criteria for diabetes: the optimal cut-off points values for the Pakistani population; a study from second National Diabetes Survey of Pakistan (NDSP) 2016-2017. *BMJ Open Diabetes Res Care* 2020; **8**.
15. Yan LD, Hanvoravongchai P, Aekplakorn W, et al. Universal coverage but unmet need: National and regional estimates of attrition across the diabetes care continuum in Thailand. *PLoS One* 2020; **15**: e0226286.
16. Krishnadath IS, Nahar-van Venrooij LM, Jaddoe VW, Toelsie JR. Ethnic differences in prediabetes and diabetes in the Suriname Health Study. *BMJ Open Diabetes Res Care* 2016; **4**: e000186.
17. Dedov I, Shestakova M, Benedetti MM, Simon D, Pakhomov I, Galstyan G. Prevalence of type 2 diabetes mellitus (T2DM) in the adult Russian population (NATION study). *Diabetes Res Clin Pract* 2016; **115**: 90-5.
18. Makrilakis K, Kalpourtzi N, Ioannidis I, et al. Prevalence of diabetes and pre-diabetes in Greece. Results of the First National Survey of Morbidity and Risk Factors (EMENO) study. *Diabetes Res Clin Pract* 2021; **172**: 108646.

19. Topor-Madry R, Wojtyniak B, Strojek K, et al. Prevalence of diabetes in Poland: a combined analysis of national databases. *Diabet Med* 2019; **36**: 1209-16.
20. Prevention CfDCa. National Diabetes Statistics Report. 2021.
21. Heidemann C, Du Y, Paprott R, Haftenberger M, Rathmann W, Scheidt-Nave C. Temporal changes in the prevalence of diagnosed diabetes, undiagnosed diabetes and prediabetes: findings from the German Health Interview and Examination Surveys in 1997-1999 and 2008-2011. *Diabet Med* 2016; **33**: 1406-14.
22. Lailier G, Piffaretti C, Fuentes S, et al. Prevalence of prediabetes and undiagnosed type 2 diabetes in France: Results from the national survey ESTEBAN, 2014-2016. *Diabetes Res Clin Pract* 2020; **165**: 108252.
23. Jørgensen ME, Ellervik C, Ekholm O, Johansen NB, Carstensen B. Estimates of prediabetes and undiagnosed type 2 diabetes in Denmark: The end of an epidemic or a diagnostic artefact? *Scandinavian journal of public health* 2020; **48**: 106-12.
24. Unwin N, Howitt C, Rose AM, Samuels TA, Hennis AJ, Hambleton IR. Prevalence and phenotype of diabetes and prediabetes using fasting glucose vs HbA1c in a Caribbean population. *J Glob Health* 2017; **7**: 020407.
25. Magliano DJ, Söderberg S, Zimmet PZ, et al. Explaining the increase of diabetes prevalence and plasma glucose in Mauritius. *Diabetes Care* 2012; **35**: 87-91.
26. Coppell KJ, Mann JI, Williams SM, et al. Prevalence of diagnosed and undiagnosed diabetes and prediabetes in New Zealand: findings from the 2008/09 Adult Nutrition Survey. *The New Zealand medical journal* 2013; **126**: 23-42.
27. Bocquet V, Ruiz-Castell M, de Beaufort C, et al. Public health burden of pre-diabetes and diabetes in Luxembourg: finding from the 2013-2015 European Health Examination Survey. *BMJ Open* 2019; **9**: e022206.
28. Soriguer F, Goday A, Bosch-Comas A, et al. Prevalence of diabetes mellitus and impaired glucose regulation in Spain: the Di@bet.es Study. *Diabetologia* 2012; **55**: 88-93.
29. Hosseini Z, Whiting SJ, Vatanparast H. Type 2 diabetes prevalence among Canadian adults - dietary habits and sociodemographic risk factors. *Applied physiology, nutrition, and metabolism = Physiologie appliquee, nutrition et metabolisme* 2019; **44**: 1099-104.
30. Lee JW, Kang HT, Lim HJ, Park B. Trends in diabetes prevalence among Korean adults based on Korean National Health and Nutrition Examination Surveys III-VI. *Diabetes Res Clin Pract* 2018; **138**: 57-65.
31. Pedersen ML. Diabetes care in the dispersed population of Greenland. A new model based on continued monitoring, analysis and adjustment of initiatives taken. *Int J Circumpolar Health* 2019; **78**: 1709257.
32. Alkandari A, Longenecker JC, Barengo NC, et al. The prevalence of pre-diabetes and diabetes in the Kuwaiti adult population in 2014. *Diabetes Res Clin Pract* 2018; **144**: 213-23.
33. El Bcheraoui C, Basulaiman M, Tuffaha M, et al. Status of the diabetes epidemic in the Kingdom of Saudi Arabia, 2013. *International journal of public health* 2014; **59**: 1011-21.
34. Gardete-Correia L, Boavida JM, Raposo JF, et al. First diabetes prevalence study in Portugal: PREVADIAB study. *Diabet Med* 2010; **27**: 879-81.
35. Sulaiman N, Albadawi S, Abusnana S, et al. High prevalence of diabetes among migrants in the United Arab Emirates using a cross-sectional survey. *Scientific reports* 2018; **8**: 6862.
36. Du Y, Heidemann C, Schaffrath Rosario A, et al. Changes in diabetes care indicators: findings from German National Health Interview and Examination Surveys 1997-1999 and 2008-2011. *BMJ Open Diabetes Res Care* 2015; **3**: e000135.
37. Liatis S, Iraklianiou S, Kazakos K, et al. A Greek registry of current type 2 diabetes management, aiming to determine core clinical approaches, patterns and strategies. *BMC Endocr Disord* 2019; **19**: 39.

38. Whyte MB, Hinton W, McGovern A, et al. Disparities in glycaemic control, monitoring, and treatment of type 2 diabetes in England: A retrospective cohort analysis. *PLoS Med* 2019; **16**: e1002942.
39. Salman RA, AlSayyad AS, Ludwig C. Type 2 diabetes and healthcare resource utilisation in the Kingdom of Bahrain. *BMC Health Serv Res* 2019; **19**: 939.
40. Sakboonyarat B, Pima W, Chokbumrungsuk C, et al. National trends in the prevalence of glycaemic control among patients with type 2 diabetes receiving continuous care in Thailand from 2011 to 2018. *Scientific reports* 2021; **11**: 14260.
41. Bak JCG, Mul D, Serné EH, et al. DPARD: rationale, design and initial results from the Dutch national diabetes registry. *BMC Endocr Disord* 2021; **21**: 122.
42. Tabesh M, Shaw JE, Zimmet PZ, et al. Meeting American Diabetes Association diabetes management targets: trends in Mauritius. *Diabet Med* 2017; **34**: 1719-27.
43. Nanayakkara N, Ranasinha S, Gadowski AM, et al. Age-related differences in glycaemic control, cardiovascular disease risk factors and treatment in patients with type 2 diabetes: a cross-sectional study from the Australian National Diabetes Audit. *BMJ Open* 2018; **8**: e020677.
44. Won JC, Lee JH, Kim JH, et al. Diabetes Fact Sheet in Korea, 2016: An Appraisal of Current Status. *Diabetes Metab J* 2018; **42**: 415-24.
45. Paulsen MS, Andersen M, Thomsen JL, et al. Multimorbidity and blood pressure control in 37 651 hypertensive patients from Danish general practice. *J Am Heart Assoc* 2012; **2**: e004531.
46. Kazemian P, Shebl FM, McCann N, Walensky RP, Wexler DJ. Evaluation of the Cascade of Diabetes Care in the United States, 2005-2016. *JAMA Intern Med* 2019; **179**: 1376-85.
47. Heintjes EM, Houben E, Beekman-Hendriks WL, et al. Trends in mortality, cardiovascular complications, and risk factors in type 2 diabetes. *Neth J Med* 2019; **77**: 317-29.
48. Murphy C, Bennett K, Fahey T, Shelley E, Graham I, Kenny RA. Statin use in adults at high risk of cardiovascular disease mortality: cross-sectional analysis of baseline data from The Irish Longitudinal Study on Ageing (TILDA). *BMJ Open* 2015; **5**: e008017.
49. Olafsdottir E, Aspelund T, Sigurdsson G, et al. Effects of statin medication on mortality risk associated with type 2 diabetes in older persons: the population-based AGES-Reykjavik Study. *BMJ Open* 2011; **1**: e000132.
50. Kim BK, Kim HC, Ha KH, Kim DJ. Application of New Cholesterol Guidelines to the Korean Adult Diabetic Patients. *J Korean Med Sci* 2015; **30**: 1612-7.
51. Yokoyama H, Oishi M, Takamura H, et al. Large-scale survey of rates of achieving targets for blood glucose, blood pressure, and lipids and prevalence of complications in type 2 diabetes (JDDM 40). *BMJ Open Diabetes Res Care* 2016; **4**: e000294.
